# Supplementary material for: Differential Impact of Science Policy on Subfields of Human Embryonic Stem Cell Research
Source: PLoS One. 2014 Apr 9;9(4):e86395. doi: 10.1371/journal.pone.0086395 (PMC3981698; doi:10.1371/journal.pone.0086395)
Supplement: Table S2 — Results of binomial test for contribution of each country in a specific subfield of hESC research between from 1998 to 2008. (XLS) [file pone.0086395.s002.xls]

## Sheet: Sheet1
Table S2. Binomial Test Results between 1998 and 2008
Country	hESC	Derivation (n=154)			Differentiation (n=839)			Medical Application (n=352)
	(proportion)	Observed	Expected	p-value	Observed	Expected	p-value	Observed	Expected	p-value
Australia	0.034	4	5.24	0.391	27	28.53	0.421	19	11.97	0.036
Belgium	0.01	3	1.54	0.201	6	8.39	0.267	4	3.52	0.468
Canada	0.031	8	4.77	0.102	23	26.01	0.341	8	10.91	0.249
China	0.094	21	14.48	0.054	75	78.87	0.347	34	33.09	0.463
Finland	0.011	1	1.69	0.509	7	9.23	0.325	3	3.87	0.48
France	0.017	1	2.62	0.258	19	14.26	0.136	6	5.98	0.559
Germany	0.026	5	4	0.363	21	21.81	0.508	9	9.15	0.552
Greece	0.009	1	1.39	0.58	9	7.55	0.38	2	3.17	0.364
India	0.009	1	1.39	0.58	8	7.55	0.52	3	3.17	0.586
Israel	0.059	18	9.09	0.005	63	49.5	0.034	20	20.77	0.483
Italy	0.014	6	2.16	0.019	8	11.75	0.202	7	4.93	0.201
Japan	0.047	3	7.24	0.066	31	39.43	0.094	16	16.54	0.511
Korea	0.06	8	9.24	0.422	59	50.34	0.117	22	21.12	0.45
Netherlands	0.018	2	2.77	0.482	15	15.1	0.575	4	6.34	0.249
Singapore	0.053	1	8.16	0.002	34	44.47	0.062	16	18.66	0.322
Spain	0.014	5	2.16	0.059	6	11.75	0.065	5	4.93	0.516
Sweden	0.043	6	6.62	0.51	33	36.08	0.349	14	15.14	0.457
UK	0.098	15	15.09	0.565	84	82.22	0.42	37	34.5	0.343
USA	0.301	37	46.35	0.056	271	252.54	0.094	101	105.95	0.297
Rest	0.053	8	8.16	0.558	40	44.47	0.254	22	18.66	0.257
