# Supplementary material for: Differential Impact of Science Policy on Subfields of Human Embryonic Stem Cell Research
Source: PLoS One. 2014 Apr 9;9(4):e86395. doi: 10.1371/journal.pone.0086395 (PMC3981698; doi:10.1371/journal.pone.0086395)
Supplement: Table S3 — Results of binomial test for contribution of each country in a specific subfield of human embryonic stem cell research in sub-periods (1998–2001, 2002–2005, 2006–2008). (XLS) [file pone.0086395.s003.xls]

## Sheet: Sheet1
Table S3. Binomial Test Results by Period
Country	Period	hESC	Derivation			Differentiation			Medical Application
			(n1=8, n2=36, n3=110)			(n1=28, n2=272, n3=539)			(n1=4, n2=110, n3=238)
			Observed	Expected	p-value	Observed	Expected	p-value	Observed	Expected	p-value
Australia	1	0.048	0	0.384	0.677	1	1.344	0.612	0	0.192	0.823
Australia	2	0.041	0	1.476	0.22	11	11.152	0.554	9	4.51	0.038
Australia	3	0.031	4	3.41	0.438	15	16.709	0.411	10	7.378	0.199
Canada	1	0.064	2	0.512	0.087	1	1.792	0.462	0	0.256	0.769
Canada	2	0.03	1	1.08	0.668	10	8.16	0.309	3	3.3	0.574
Canada	3	0.029	5	3.19	0.21	12	15.631	0.227	5	6.902	0.319
China	1	0.079	0	0.632	0.516	2	2.212	0.614	1	0.316	0.282
China	2	0.085	6	3.06	0.082	21	23.12	0.368	11	9.35	0.335
China	3	0.098	15	10.78	0.122	52	52.822	0.477	22	23.324	0.432
France	1	0.064	0	0.512	0.592	3	1.792	0.261	1	0.256	0.231
France	2	0.005	0	0.18	0.82	2	1.36	0.441	0	0.55	0.545
France	3	0.018	1	1.98	0.397	14	9.702	0.128	5	4.284	0.445
Germany	1	0.032	0	0.256	0.773	0	0.896	0.406	0	0.128	0.879
Germany	2	0.022	1	0.792	0.551	6	5.984	0.554	2	2.42	0.563
Germany	3	0.027	4	2.97	0.336	15	14.553	0.466	7	6.426	0.447
Israel	1	0.206	3	1.648	0.217	7	5.768	0.353	0	0.824	0.397
Israel	2	0.091	7	3.276	0.04	29	24.752	0.206	6	10.01	0.12
Israel	3	0.038	8	4.18	0.058	27	20.482	0.089	14	9.044	0.071
Italy	1	0.048	1	0.384	0.323	2	1.344	0.388	0	0.192	0.823
Italy	2	0.008	0	0.288	0.743	1	2.176	0.346	1	0.88	0.596
Italy	3	0.013	5	1.43	0.016	5	7.007	0.278	6	3.094	0.1
Japan	1	0.016	0	0.128	0.88	0	0.448	0.638	0	0.064	0.938
Japan	2	0.039	0	1.404	0.243	8	10.608	0.277	5	4.29	0.418
Japan	3	0.052	3	5.72	0.167	23	28.028	0.183	11	12.376	0.407
Netherlands	1	0.016	0	0.128	0.88	0	0.448	0.638	0	0.064	0.938
Netherlands	2	0.014	0	0.504	0.609	4	3.808	0.512	1	1.54	0.554
Netherlands	3	0.02	2	2.2	0.635	11	10.78	0.481	3	4.76	0.316
Singapore	1	0.016	0	0.128	0.88	0	0.448	0.638	0	0.064	0.938
Singapore	2	0.063	1	2.268	0.327	14	17.136	0.258	3	6.93	0.078
Singapore	3	0.051	0	5.61	0.003	20	27.489	0.078	13	12.138	0.446
Sweden	1	0.032	0	0.256	0.773	2	0.896	0.222	1	0.128	0.121
Sweden	2	0.039	2	1.404	0.406	8	10.608	0.277	3	4.29	0.385
Sweden	3	0.045	4	4.95	0.443	23	24.255	0.446	10	10.71	0.49
UK	1	0.095	0	0.76	0.449	2	2.66	0.494	0	0.38	0.67
UK	2	0.11	6	3.96	0.198	27	29.92	0.329	13	12.1	0.435
UK	3	0.093	9	10.23	0.419	55	50.127	0.26	24	22.134	0.374
USA	1	0.222	2	1.776	0.56	7	6.216	0.433	1	0.888	0.634
USA	2	0.297	5	10.692	0.024	86	80.784	0.26	36	32.67	0.272
USA	3	0.308	30	33.88	0.242	178	166.012	0.147	64	73.304	0.105
1. Period 1 is years between 1998 and 2001, period 2 is years between 2002 and 2005, and period 3 is years between 2006 and 2008.
